# Supplementary material for: Sandwich-like PdO/CeO2nanosheet@HZSM-5 membrane hybrid composite for methane combustion: self-redispersion, sintering-resistance and oxygen, water-tolerance
Source: Royal Society of Chemistry journal article supplement (doi:10.1039/c6nr01800a), 2016-01-01
Supplement: c6nr01800a1.pdf [file c6nr01800a1.pdf]

# **Sandwich-like PdO/CeO<sub>2</sub> nanosheet@HZSM-5 membrane hybrid composite for methane combustion: self-redispersion, sintering-resistance and oxygen, water-tolerance**

Qiguang Dai, Shuxing Bai, Yang Lou, Xingyi Wang\*, Yun Guo and Guanzhong Lu\*  
Key Lab for Advanced Materials, Research Institute of Industrial Catalysis, East China University of Science and Technology, Shanghai 200237, PR China  
E-mail: wangxy@ecust.edu.cn (X. Wang), gzhlu@ecust.edu.cn (G. Lu)

[\*\*] This work is supported by the National Natural Science Foundation of China (Nos. 21307033, 21277047 and 21477036), and Shanghai Natural Science Foundation (No. 13ZR1411000).

**Abstract:** *PdO/CeO<sub>2</sub> nanosheets encapsulated by a monolayer of continuous and dense HZSM-5 zeolite membrane were prepared through a facile in situ hydrothermal growth process as a high-efficient and thermal stable catalyst for methane combustion. Uncoated PdO/CeO<sub>2</sub> suffered severe sintering at high temperature or high-oxygen concentration, in despite of a high catalytic activity due to the high dispersion of PdO<sub>x</sub> on the monodispersed CeO<sub>2</sub> nanosheets, however, the encapsulation of HZSM-5 significantly improved the sintering-resistance via the anchoring and isolation effects of HZSM-5 coating for PdO<sub>x</sub> nanoparticles, resulting in the outstanding thermal stability of PdO/CeO<sub>2</sub>. Moreover, the synthesized hybrid materials exhibited good oxygen and water-tolerance for methane combustion. Additionally, a re-activation behavior was observed due to the self-redispersion of PdO<sub>x</sub> on CeO<sub>2</sub> nanosheets in the reaction atmosphere and at high temperature.*

## **Experimental Section**

### **Synthesis of monodispersed CeO<sub>2</sub> nanosheets**

In a typical synthesis procedure, 1.39 g cerium (III) nitrate hexahydrate (Ce(NO<sub>3</sub>)<sub>3</sub>•6H<sub>2</sub>O) and 0.75 g ammonium bicarbonate (NH<sub>4</sub>HCO<sub>3</sub>) were dissolved in 200 ml deionized water at 25 °C under magnetic stirring, respectively. After completely dissolved, the NH<sub>4</sub>HCO<sub>3</sub> solution was poured rapidly into the Ce(NO<sub>3</sub>)<sub>3</sub> solution, and then stirring for 0.5 h and statically aging 24 h at 25 °C. The final product was collected by filtration, washed with deionized water, and then dried at 50

°C and calcined at 450 °C for 4 h in air.

#### **Preparation of PdO supported CeO<sub>2</sub> nanosheets (PdO/CeO<sub>2</sub>)**

1.0 g of CeO<sub>2</sub> nanosheet was suspended in 100 ml of ethanol-water (1:1) with stirring. Exactly 43 mg of PdCl<sub>2</sub> was suspended in 100 ml of ethanol with stirring until PdCl<sub>2</sub> was completely dissolved (for more 4 h). The metal-ethanol solution was added to CeO<sub>2</sub> nanosheet suspension with stirring at room temperature for 24 h. The residue was filtered and washed several times with hot water and the last with ethanol, dried in an oven at 50 °C for 24 h, the obtained sample was remarked as Pd/CeO<sub>2</sub>. The Pd/CeO<sub>2</sub> was calcined at 450 °C for 4 h in air and denoted as PdO/CeO<sub>2</sub>.

#### **Preparation of CeO<sub>2</sub>@ZSM-5 and PdO/CeO<sub>2</sub>@ZSM-5**

0.31 g of sodium chloride (NaCl), 2.5g of polyethylene glycol 600 (PEG 600) and 5.625g of tetrapropylammonium hydroxide (TPAOH, 25%) were added sequentially into 25 g of deionized water under stirring, followed by the addition of 0.1 g of aluminium isopropoxide (AIP). After ultrasonic treatment for 15 min and stirring for 10 min, 3.27 g of tetraethyl orthosilicate (TEOS) was added to the solution quickly under stirring, and then 0.75 g of CeO<sub>2</sub> nanosheet or PdO/CeO<sub>2</sub> was suspended. After stirred for 24 h at room temperature, the resulting solution was transferred into an autoclave (50 ml) for further crystallization at 80 °C for 24 h and then 170 °C for 48 h under dynamic condition (60 rpm). Finally, the as-synthesized products were collected by filtration, dried, and calcined at 450 °C in air to remove the template, and were denoted as CeO<sub>2</sub>@ZSM-5 and PdO/CeO<sub>2</sub>@ZSM-5, respectively. To produce HZSM-5, the calcined products were ion exchanged three times in a large excess of aqueous 1 M solutions of NH<sub>4</sub>NO<sub>3</sub> (1 M, L/S = 30 mL/g) at 80 °C and calcined at 450 °C for 4 h. Synthesis procedures of HZSM-5 were the same as CeO<sub>2</sub>@ZSM-5 except the addition of CeO<sub>2</sub> and calcined at 550 °C.

#### **Catalytic tests**

Methane combustion experiments were performed in a U-shaped quartz microreactor with an internal diameter of 3 mm at atmospheric pressure. The catalyst (100 mg) was sieved below 60-80 mesh of grain size and loaded into the bottom of reactor between two layers of granular quartz, used both for preventing displacement of the catalyst powder and pre-heating the reactant mixture. The reactant mixture composition was controlled by varying the flow rates of CH<sub>4</sub> (0.5 vol. %), O<sub>2</sub> (10.0 vol. %) and Ar while the total flow rate was kept constant at 50 ml min<sup>-1</sup>, and the conditions corresponded to Gas Hourly Space Velocity (GHSV) of 30,000 ml g<sup>-1</sup> h<sup>-1</sup>. To record light-off curves, the catalyst was heated from 100 °C to 850 °C at 5 °C min<sup>-1</sup>, and the

conversion of methane was measured by an on-line gas chromatograph equipped with a flame ionization detector (FID). Sequentially, hold for 150 minutes at 850 °C and then cooled-down to 100 °C under the reaction atmosphere, the second light-off curve was recorded.

### **Synthesis of CeO<sub>2</sub> nanosheets by different methods**

#### **(1) CeO<sub>2</sub>-NS**

In a typical synthesis procedure, 1.39 g cerium (III) nitrate hexahydrate (Ce(NO<sub>3</sub>)<sub>3</sub>•6H<sub>2</sub>O) and 0.75 g ammonium bicarbonate (NH<sub>4</sub>HCO<sub>3</sub>) were dissolved in 200 ml deionized water at 0 °C under magnetic stirring, respectively. After completely dissolved, the NH<sub>4</sub>HCO<sub>3</sub> solution was poured rapidly into the Ce(NO<sub>3</sub>)<sub>3</sub> solution, and then stirring for 0.5 h and statically aging 15 h at 0 °C. The final product was collected by filtration, washed with deionized water to remove any possible ionic remnants, and then dried at 110 °C and calcined at 450 °C for 4 h in air to prepare the petal-like CeO<sub>2</sub> nanosheets, marked as CeO<sub>2</sub>-NS.

#### **(2) CeO<sub>2</sub>-HT**

In a typical synthesis procedure, 1.39g Ce(NO<sub>3</sub>)<sub>3</sub>•6H<sub>2</sub>O was dissolved in 60 ml deionized water to form a transparent solution, then 3g hexamethylenetetramine (HMT) and 4ml acetic acid were added. The solution was stirred vigorously for 30 min and then poured in to a Teflon-lined stainless steel autoclave. After being sealed, the vessel was placed into a thermostat oven at 170 °C for 15 h. After cooling down to room temperature naturally, the white powder was collected by centrifugation, washed with deionized water and anhydrous alcohol for three times to remove other ions and then dried at 60 °C in air for 12h. The CeO<sub>2</sub> nanosheets were obtained via annealing the precursor at 450 °C for 4 h, and marked as CeO<sub>2</sub>-HT.

#### **(3) CeO<sub>2</sub>-ST**

Cerium nitrate hexahydrate (Ce(NO<sub>3</sub>)<sub>3</sub>•6H<sub>2</sub>O) and ethylene glycol (C<sub>2</sub>H<sub>6</sub>OH, EG) as reagents. Initially, 6.10g Ce(NO<sub>3</sub>)<sub>3</sub>•6H<sub>2</sub>O was dissolved in 50ml EG and stirred vigorously to form a stable transparent solution. The mixed solution was transferred into a 75 ml Teflon autoclave containing a vertically immersed cleaned glass substrates. The stainless steel Teflon autoclave was kept in an oven at 180 °C for 28 h. Finally, the autoclave was cooled down to room temperature. The obtained nanosheets were washed several times with double distilled water, and dried in at 80 °C. Furthermore, CeO<sub>2</sub> nanosheets were obtained by annealing at 450 °C for 4 h, and marked as CeO<sub>2</sub>-ST.

CeO<sub>2</sub>

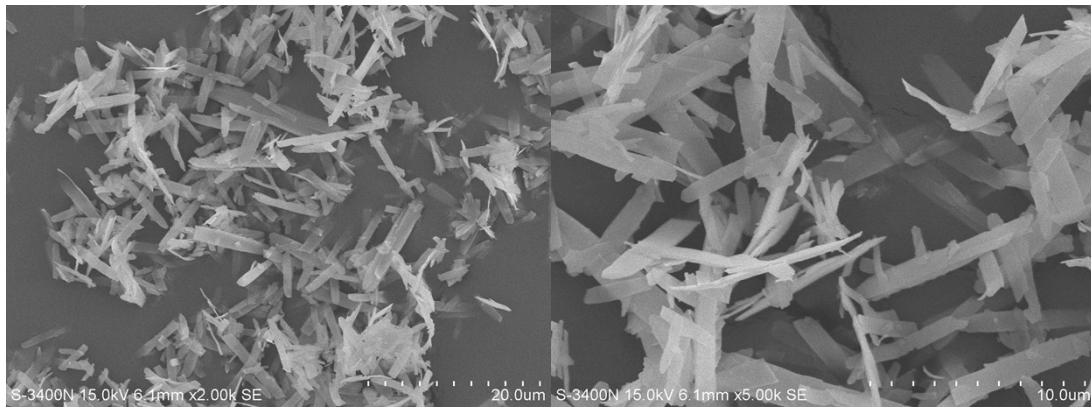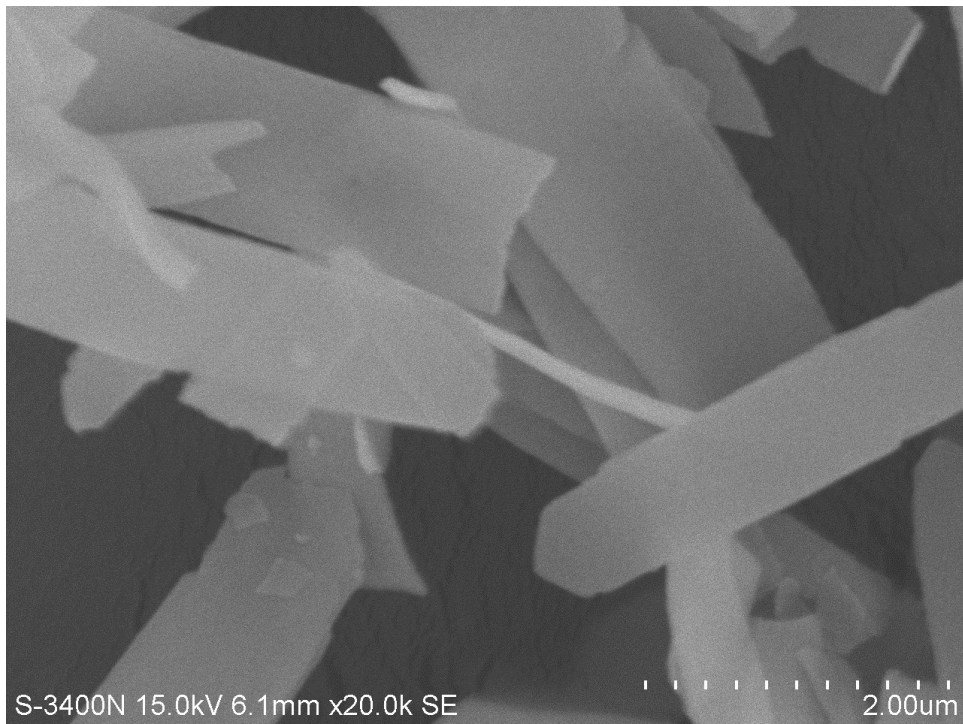

## HZSM-5

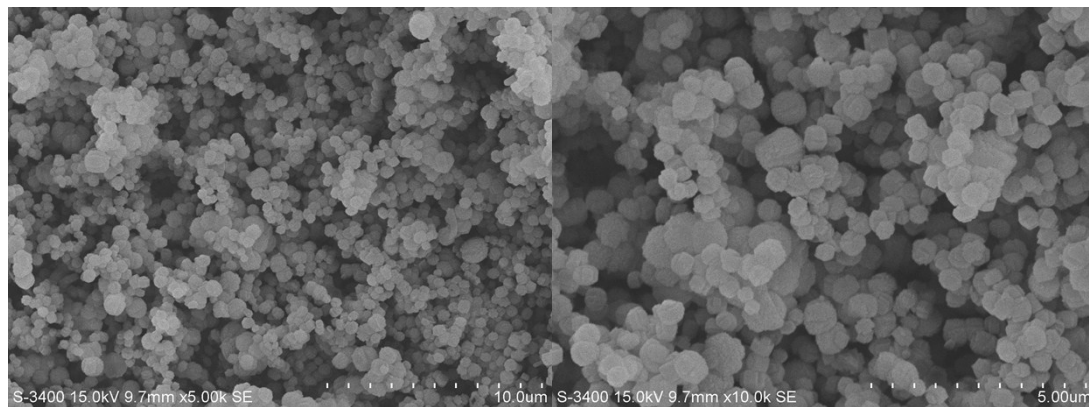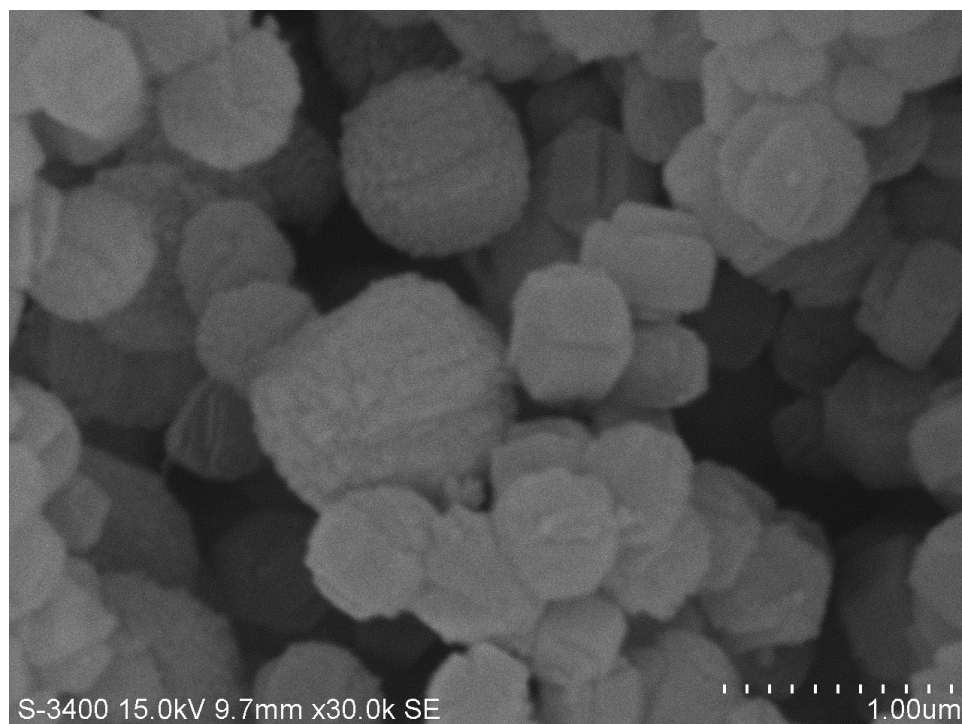

# $\text{CeO}_2@\text{ZSM-5}$

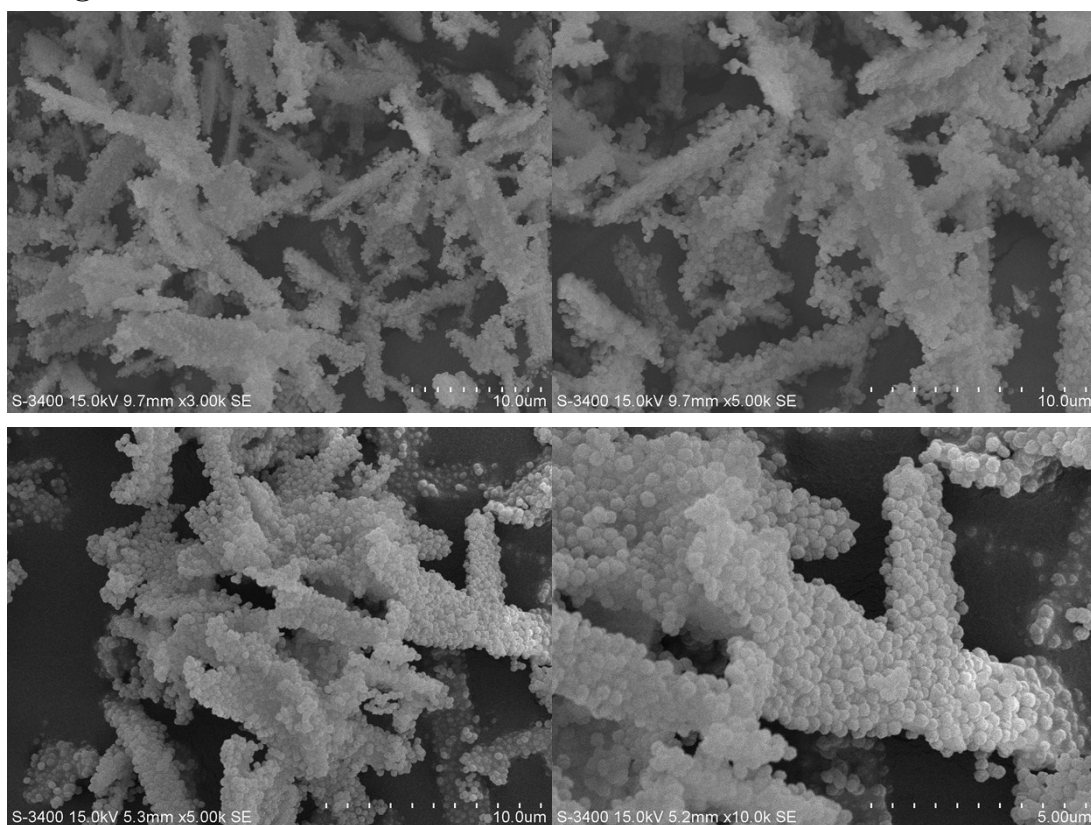

PdO supported CeO<sub>2</sub> nanosheet@ZSM-5 (PdO/CeO<sub>2</sub>@ZSM-5)

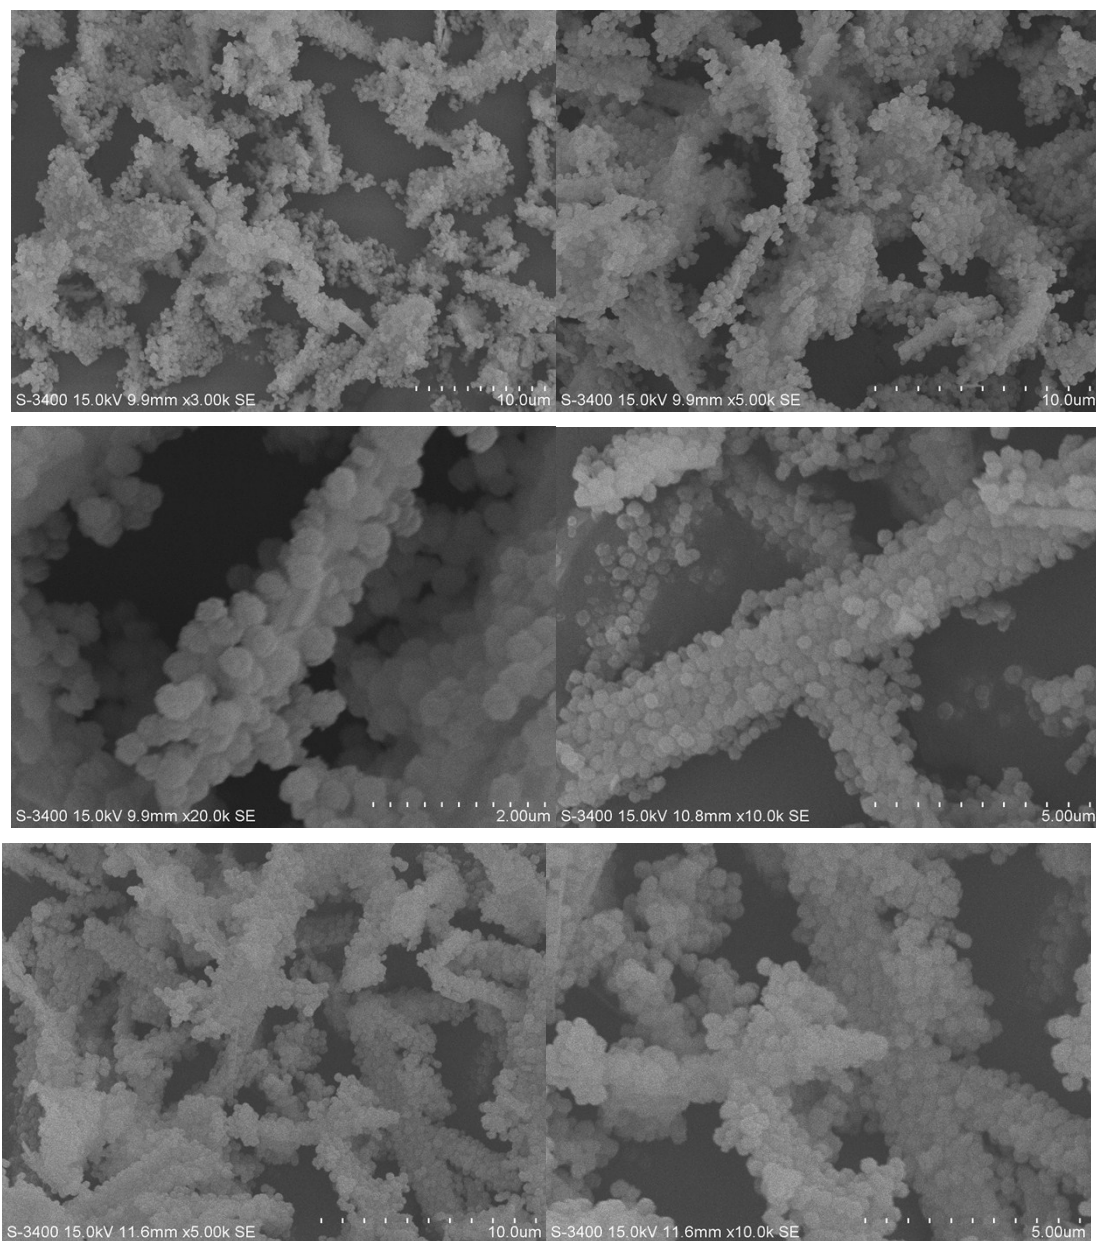

Figure S1 SEM images of the synthesized CeO<sub>2</sub> (a), HZSM-5 (b), CeO<sub>2</sub>@HZSM-5 (c) and PdO/CeO<sub>2</sub>@HZSM-5 (d) samples

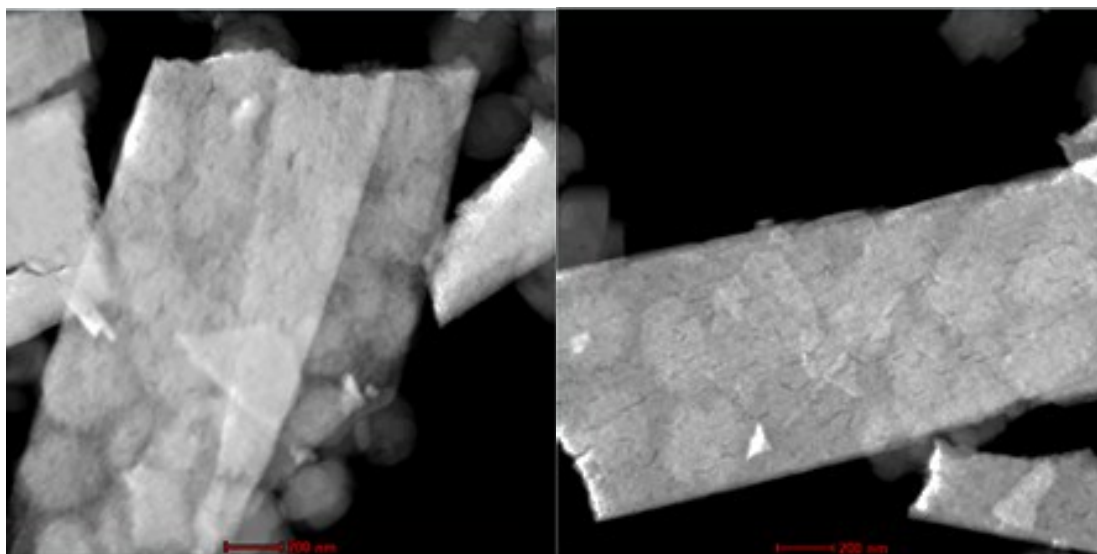

Figure S2 HAADF-STEM images of PdO/CeO<sub>2</sub>@HZSM-5

Table S1 Physicochemical properties of synthesized materials

| Samples                      | S <sub>BET</sub><br>m <sup>2</sup> /g | pore size<br>nm | Pore Volume<br>ml/g | XRF                                              |            |                         | Pd dispersion (%) |       |
|------------------------------|---------------------------------------|-----------------|---------------------|--------------------------------------------------|------------|-------------------------|-------------------|-------|
|                              |                                       |                 |                     | SiO <sub>2</sub> /Al <sub>2</sub> O <sub>3</sub> | PdO<br>wt% | CeO <sub>2</sub><br>wt% | Fresh             | Spent |
| CeO <sub>2</sub> -NB         | 78                                    | 3.2             | 0.06                | -                                                | -          | -                       | -                 | -     |
| HZSM-5                       | 335                                   | 2.7             | 0.23                | 108                                              | -          | -                       | -                 | -     |
| CeO <sub>2</sub> @HZSM-5     | 171                                   | 4.2             | 0.18                | 151                                              | -          | 45                      | -                 | -     |
| PdO/CeO <sub>2</sub>         | 50                                    | 3.8             | 0.05                | -                                                | 2.3        | -                       | 78                | 88    |
| PdO/HZSM-5                   | 339                                   | 3.3             | 0.28                | -                                                | -          | -                       | -                 | -     |
| PdO/CeO <sub>2</sub> @HZSM-5 | 172                                   | 3.7             | 0.16                | 145                                              | 0.93       | 42                      | 30                | 41    |



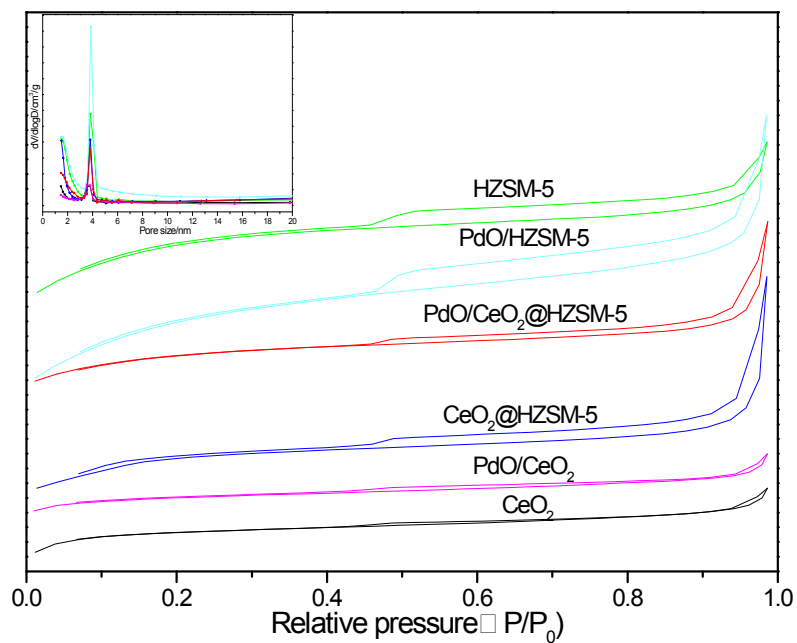

Figure S3 The  $N_2$  adsorption-desorption isotherms and pore size distribution curves of synthesized composite catalysts.

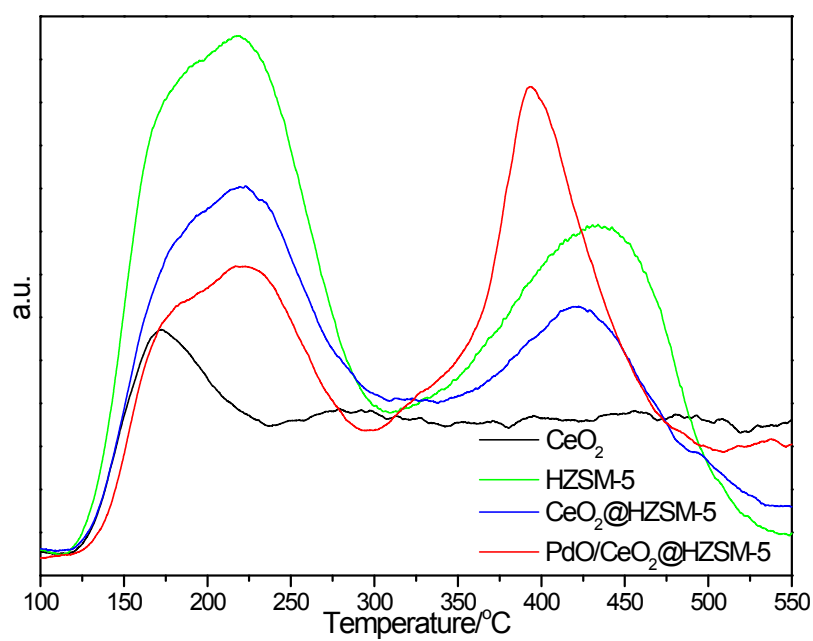

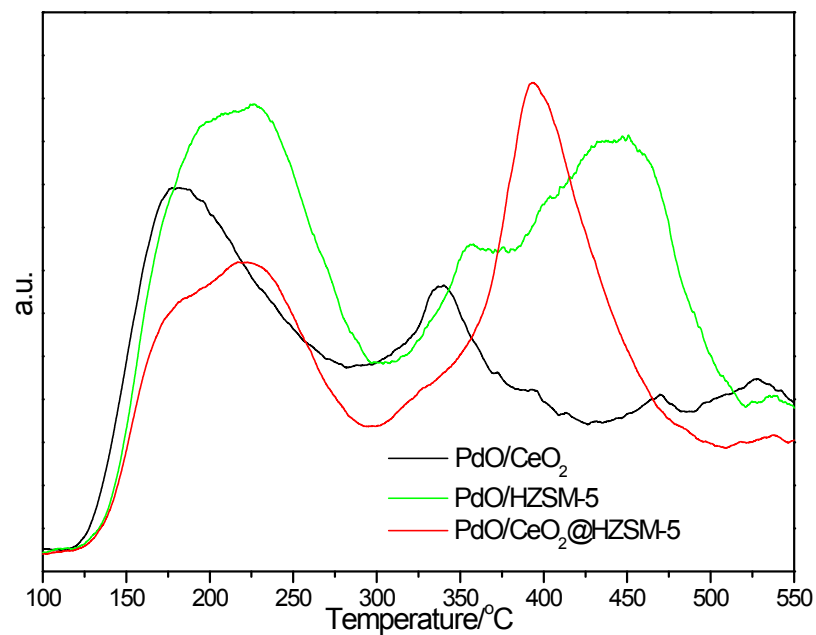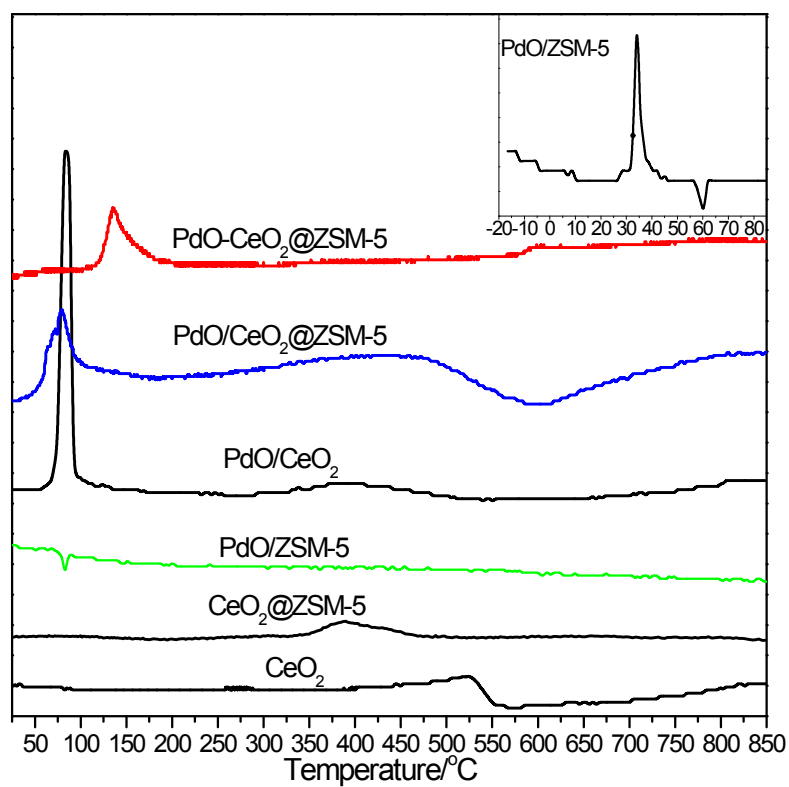

Figure S4  $\text{NH}_3$ -TPD and  $\text{H}_2$ -TPR profiles of synthesized composite catalysts.

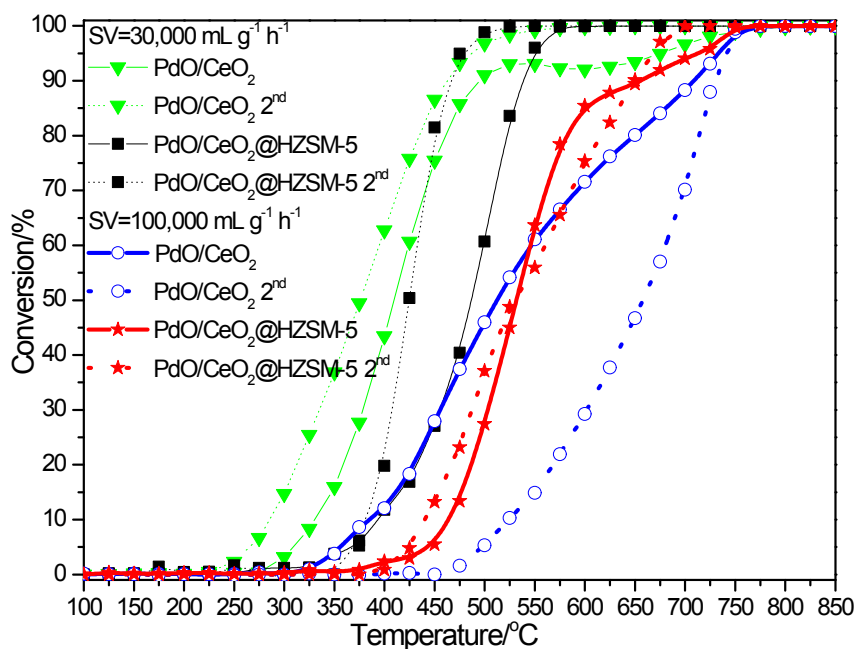

Figure S5 Light-off curves of  $\text{CH}_4$  conversion vs the temperature over  $\text{PdO/CeO}_2$  and  $\text{PdO/CeO}_2\text{@HZSM-5}$ . Conditions: 0.5 vol.%  $\text{CH}_4$  + 10 vol.%  $\text{O}_2/\text{Ar}$ , GHSV of 30,000 and 100,000  $\text{mL g}^{-1} \text{h}^{-1}$ .

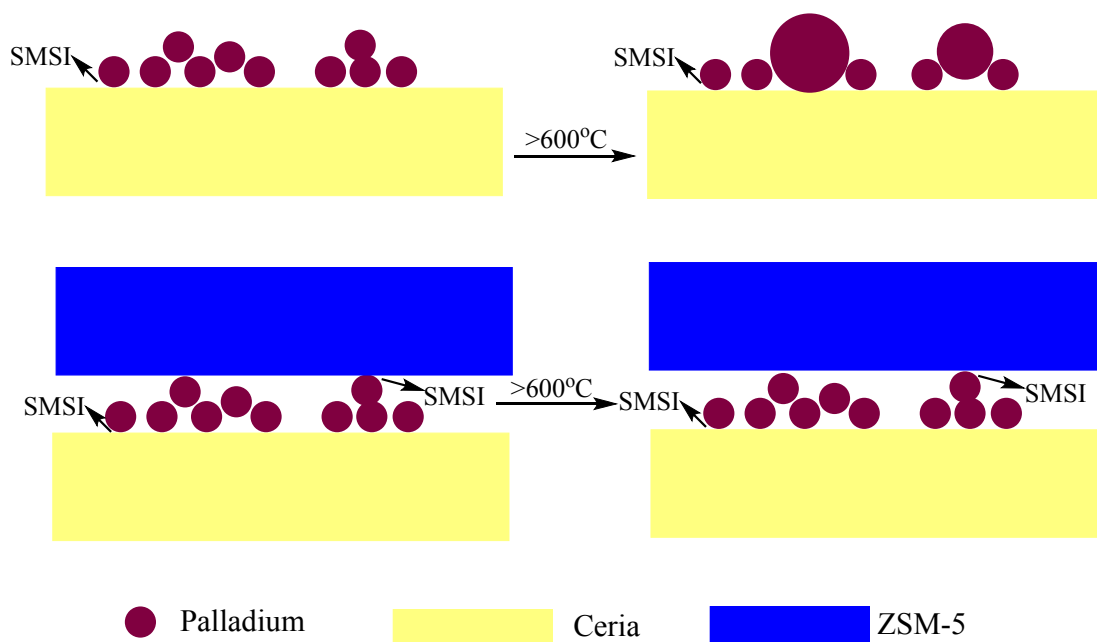

Figure S6 Schematic diagram showing a dip in the methane conversion (transient deactivation) is observed at 600–750°C.

PdO/CeO<sub>2</sub>-HT

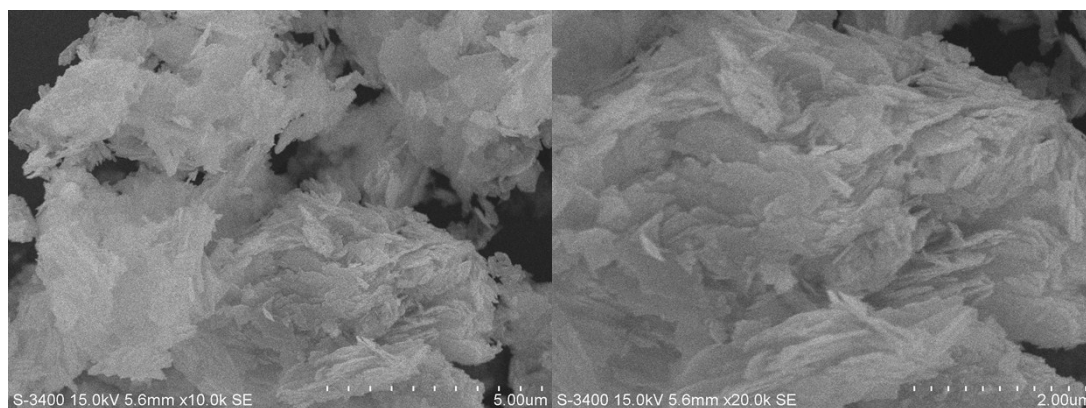

PdO/CeO<sub>2</sub>-ST

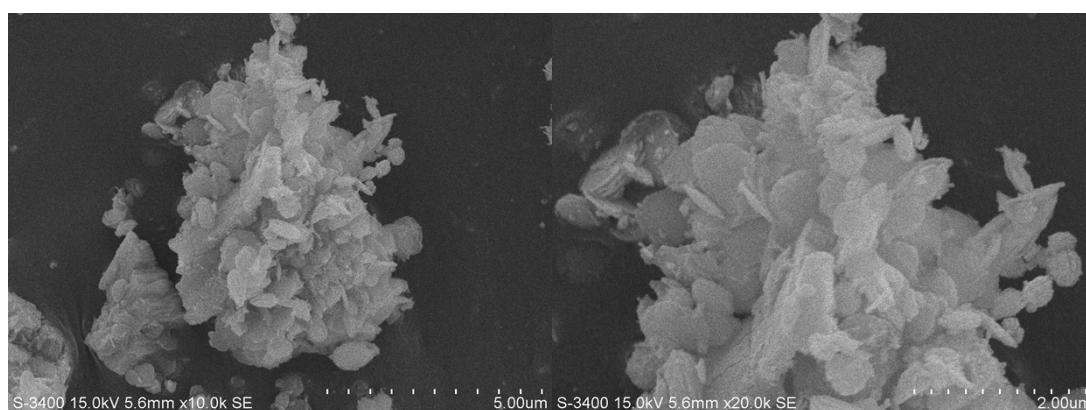

PdO/CeO<sub>2</sub>-NS

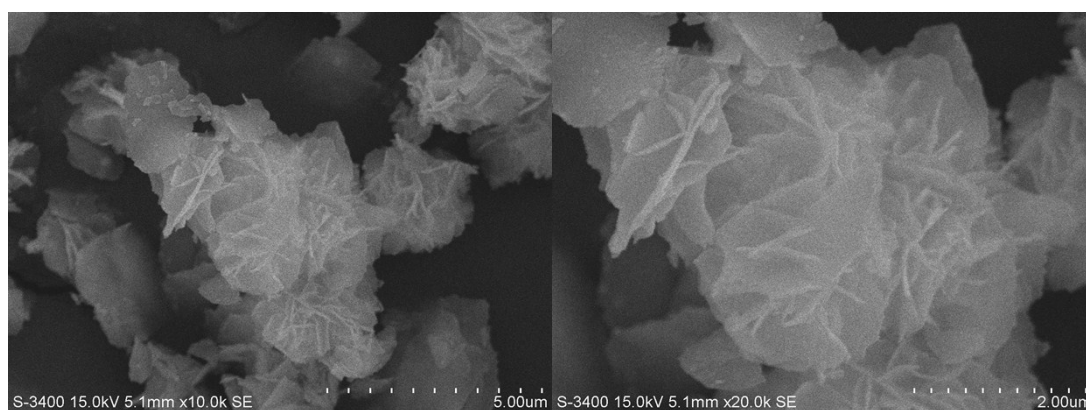

Figure S7 SEM images of the synthesized CeO<sub>2</sub> samples by different method.

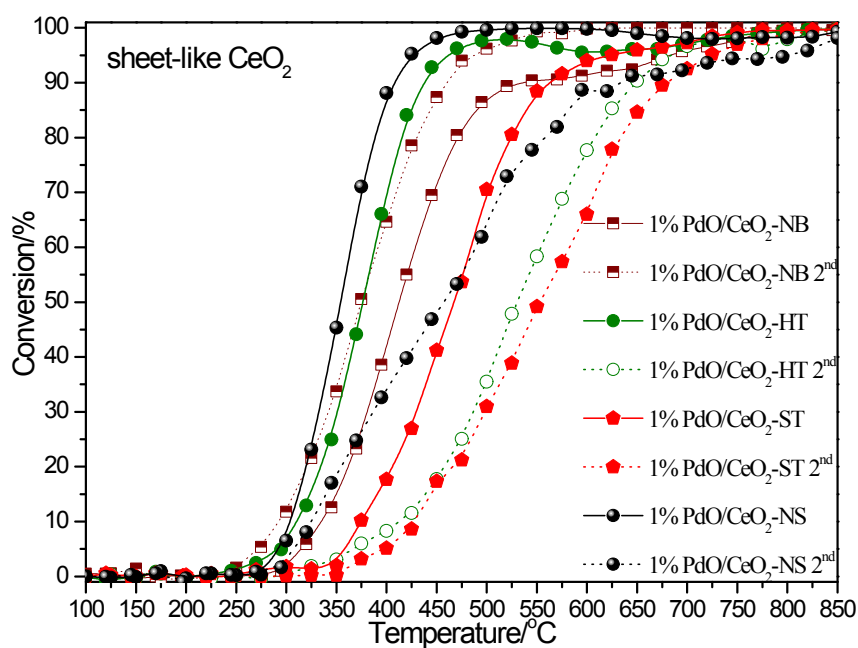

Figure S8 Light-off curves of  $\text{CH}_4$  conversion vs the temperature. The dot lines correspond to the second cycle. Conditions:  $\text{CH}_4$  (0.5 vol. %),  $\text{O}_2$  (10 vol. %) in Ar, GHSV = 30,000  $\text{mL g}^{-1} \text{h}^{-1}$ .

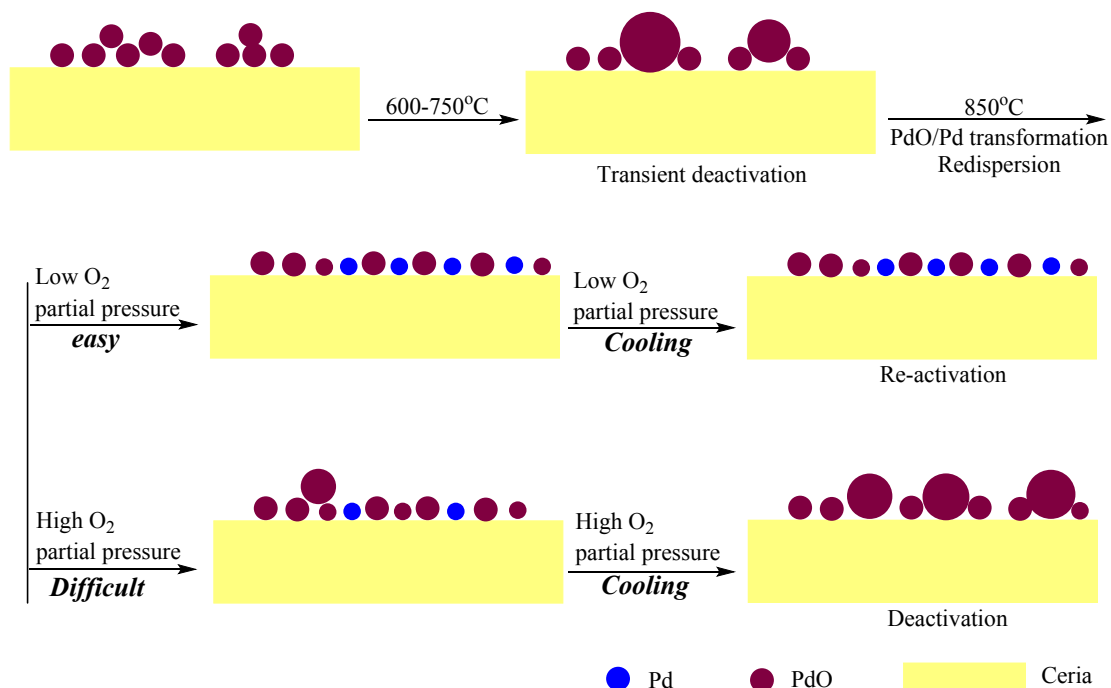

Figure S9 Schematic diagram showing the re-activation of  $\text{PdO/CeO}_2$  catalysts at high temperature under methane atmosphere and appropriate oxygen content.

PdO/CeO<sub>2</sub>-450 (fresh PdO/CeO<sub>2</sub>)

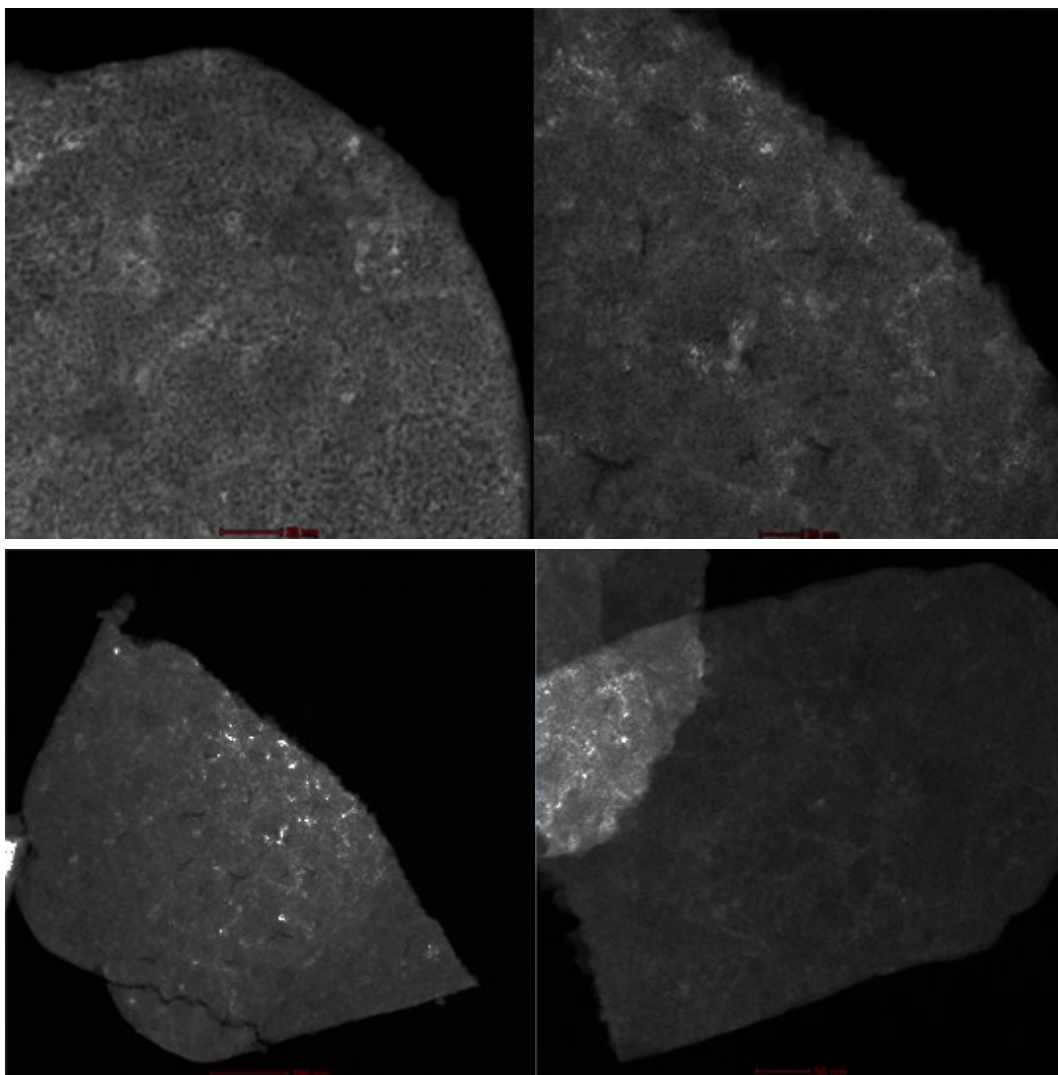

PdO/CeO<sub>2</sub>-850 (aged PdO/CeO<sub>2</sub>)

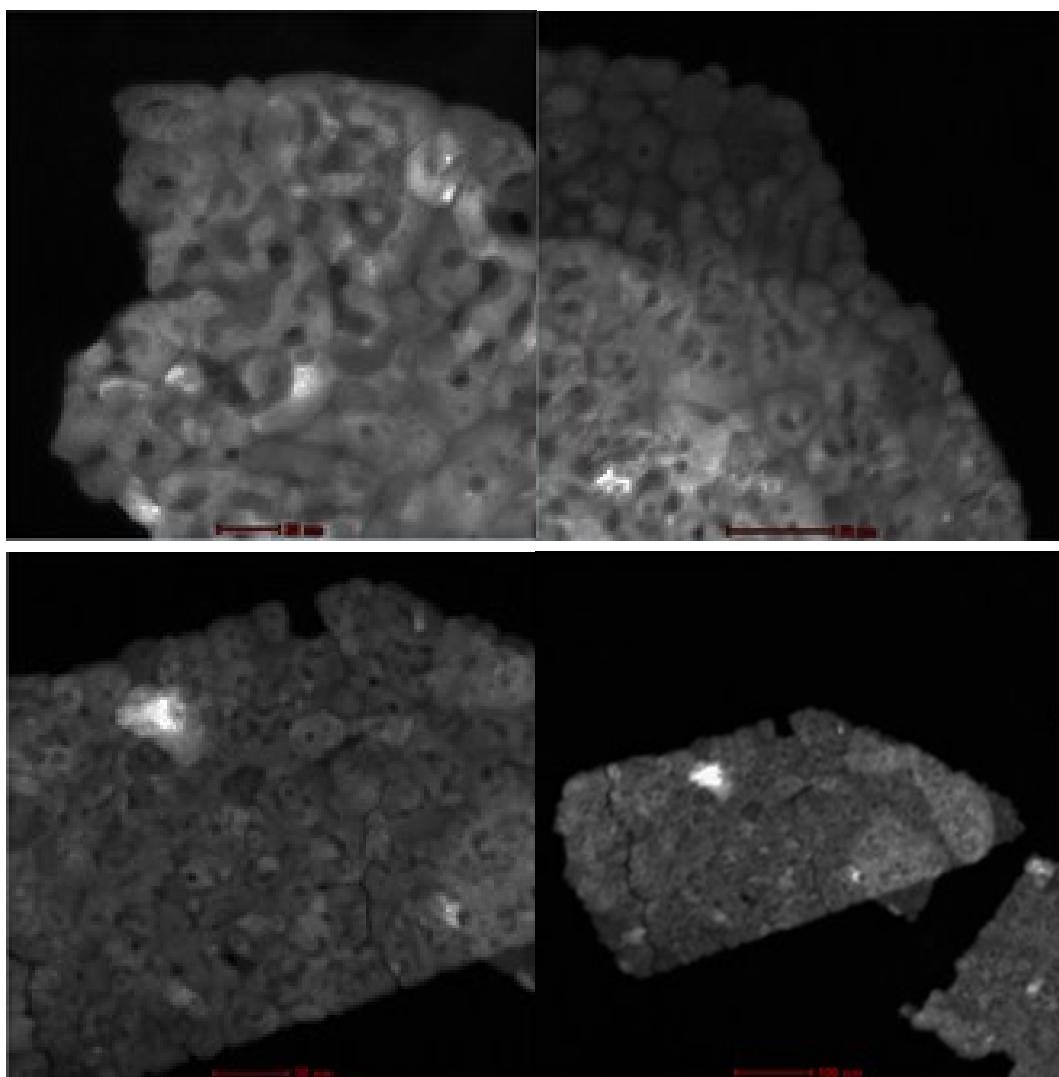

# EDS of PdO/CeO<sub>2</sub>-850

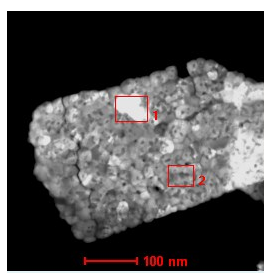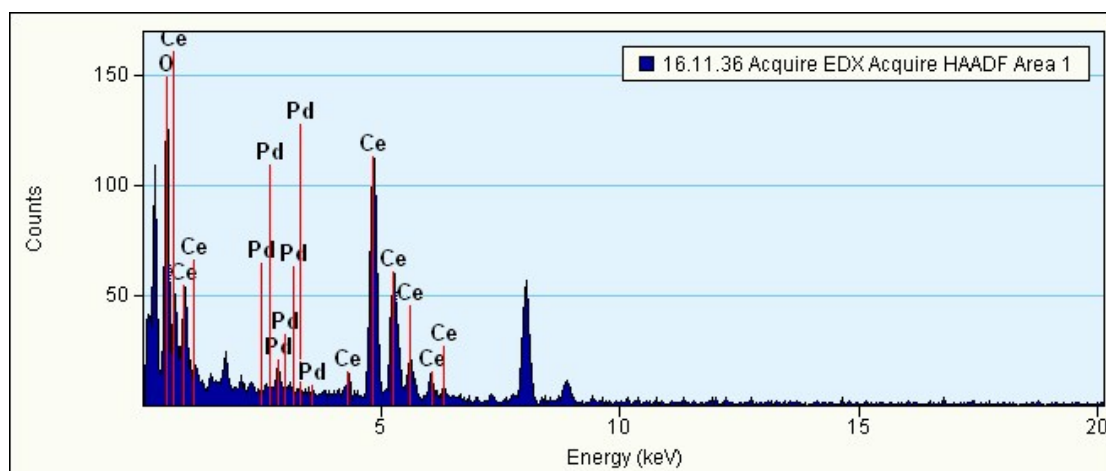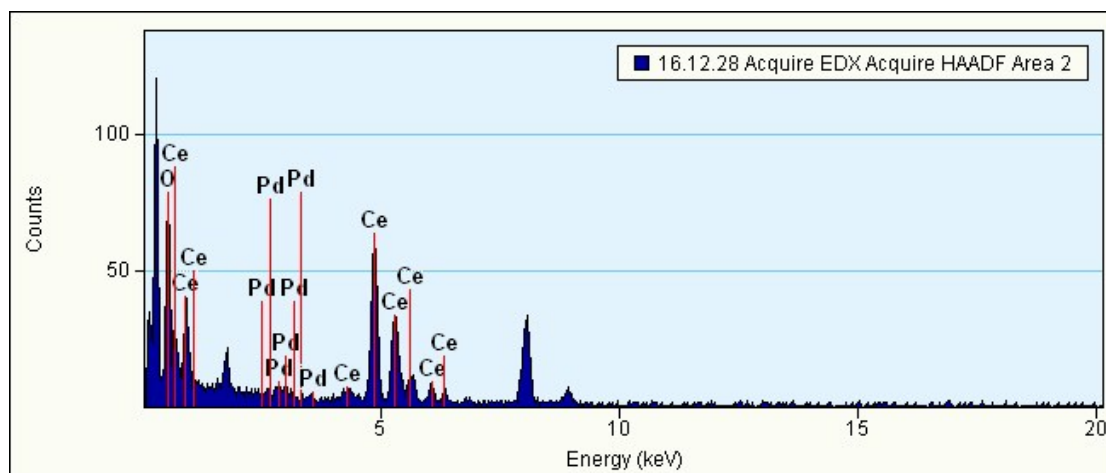



Spent PdO/CeO<sub>2</sub>

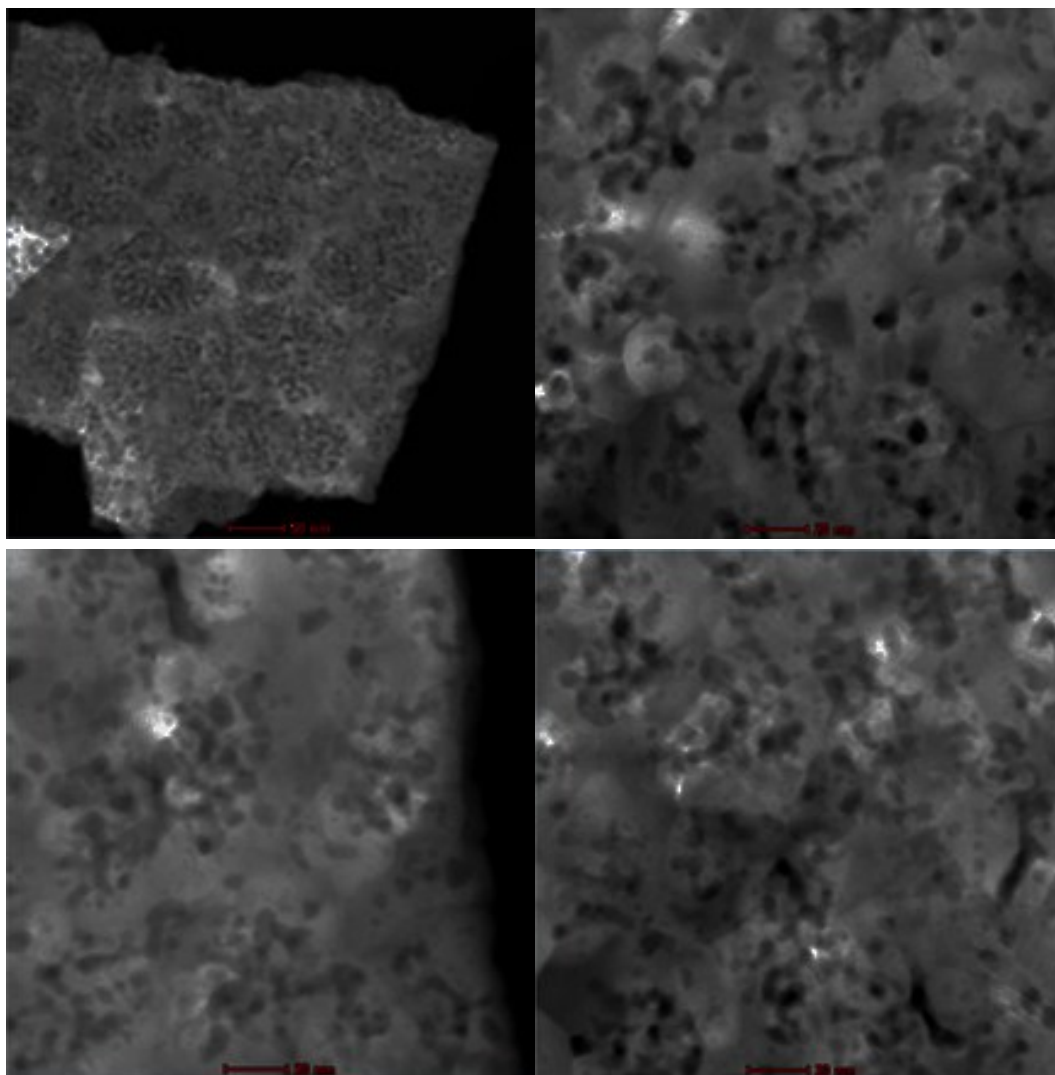

Spent PdO/CeO<sub>2</sub>-aged

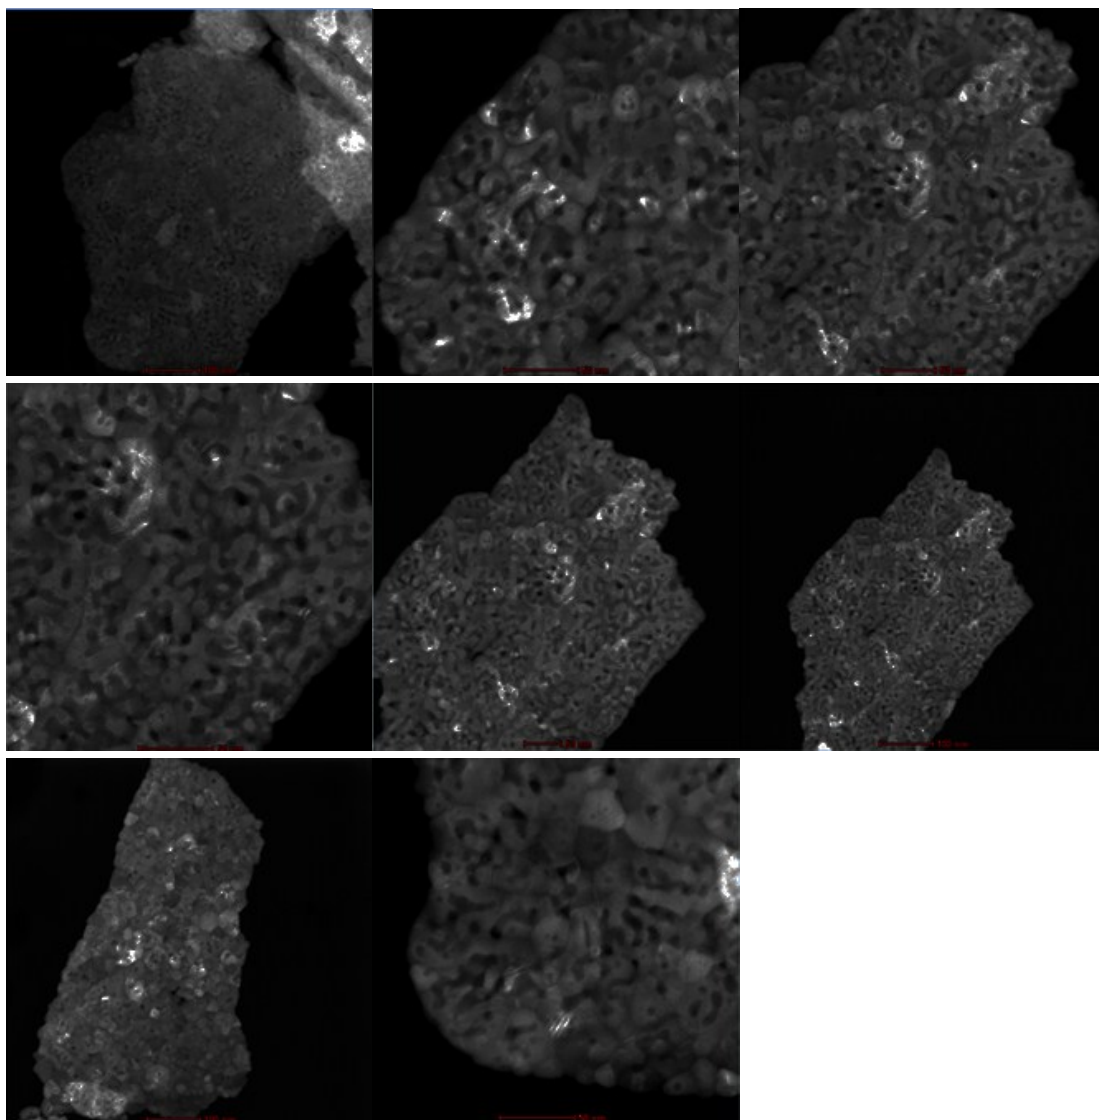

Aged PdO/CeO<sub>2</sub>@HZSM-5

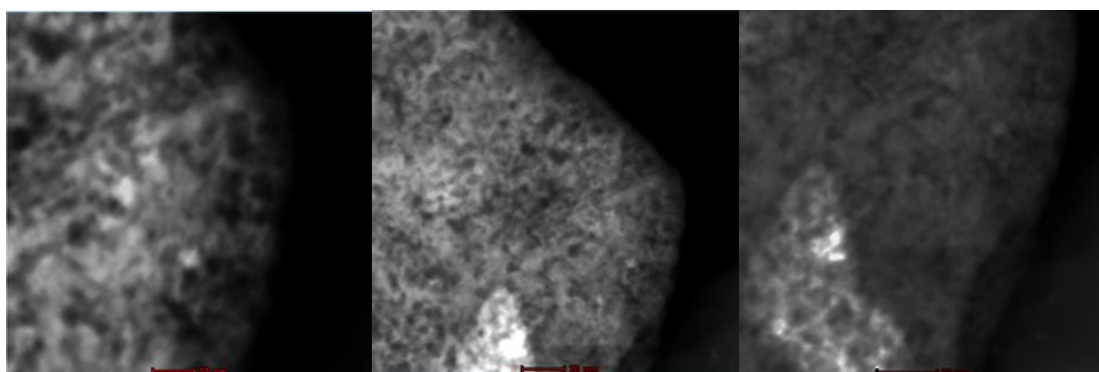

Figure S10 HAADF-STEM images of the fresh, aged and spent catalysts.

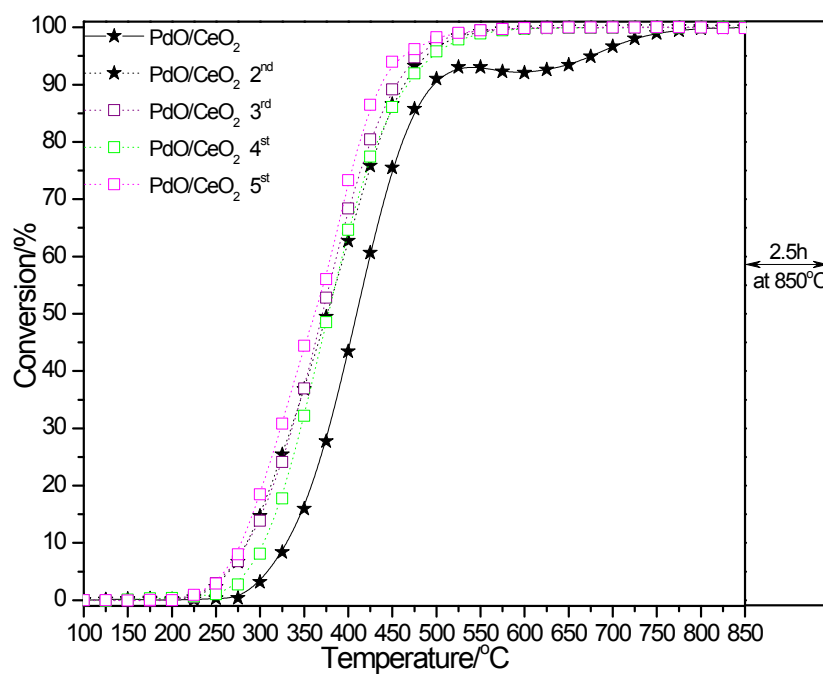

Figure S11 The stability of PdO/CeO<sub>2</sub>.
